# Supplementary material for: Quantitative Biodistribution and Pharmacokinetics Study of GMP-Grade Exosomes Labeled with 89Zr Radioisotope in Mice and Rats
Source: MDPI journal article supplement (doi:10.3390/pharmaceutics14061118), 2022-05-24
Supplement: s1 [file s1]

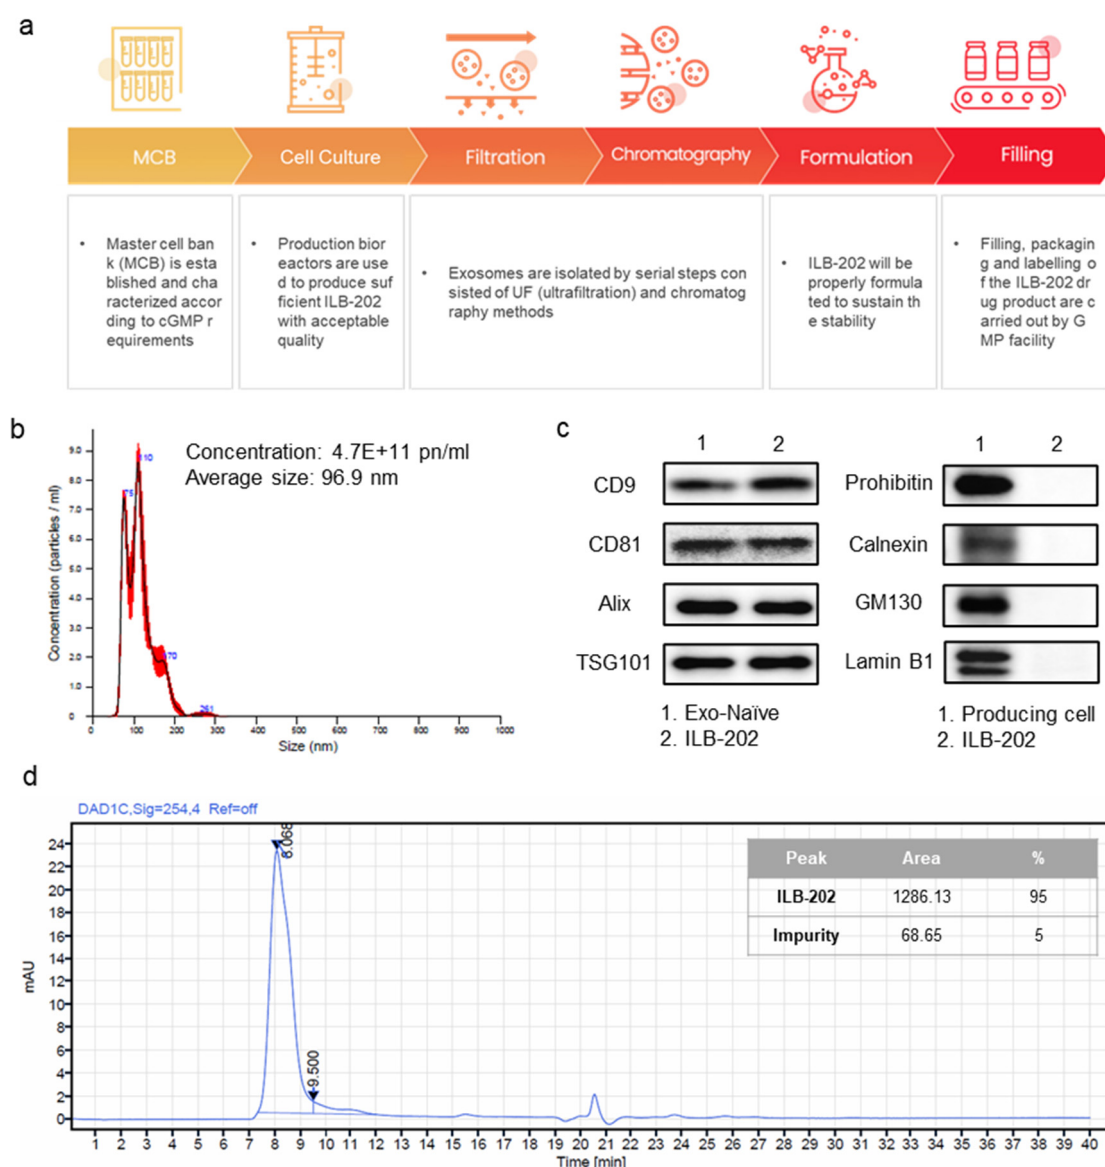

**Figure S1.** Production and characterization of therapeutic exosomes. **(a)** Schematics of isolation process for therapeutic exosomes are shown. **(b)** Size of ILB-202 were measured by NTA. **(c)** Positive and negative markers for exosomes were analyzed in naturally produced exosomes (Exo-Naïve) and ILB-202 by immunoblotting. **(d)** Purity of ILB-202 were analyzed by high performance liquid chromatography.

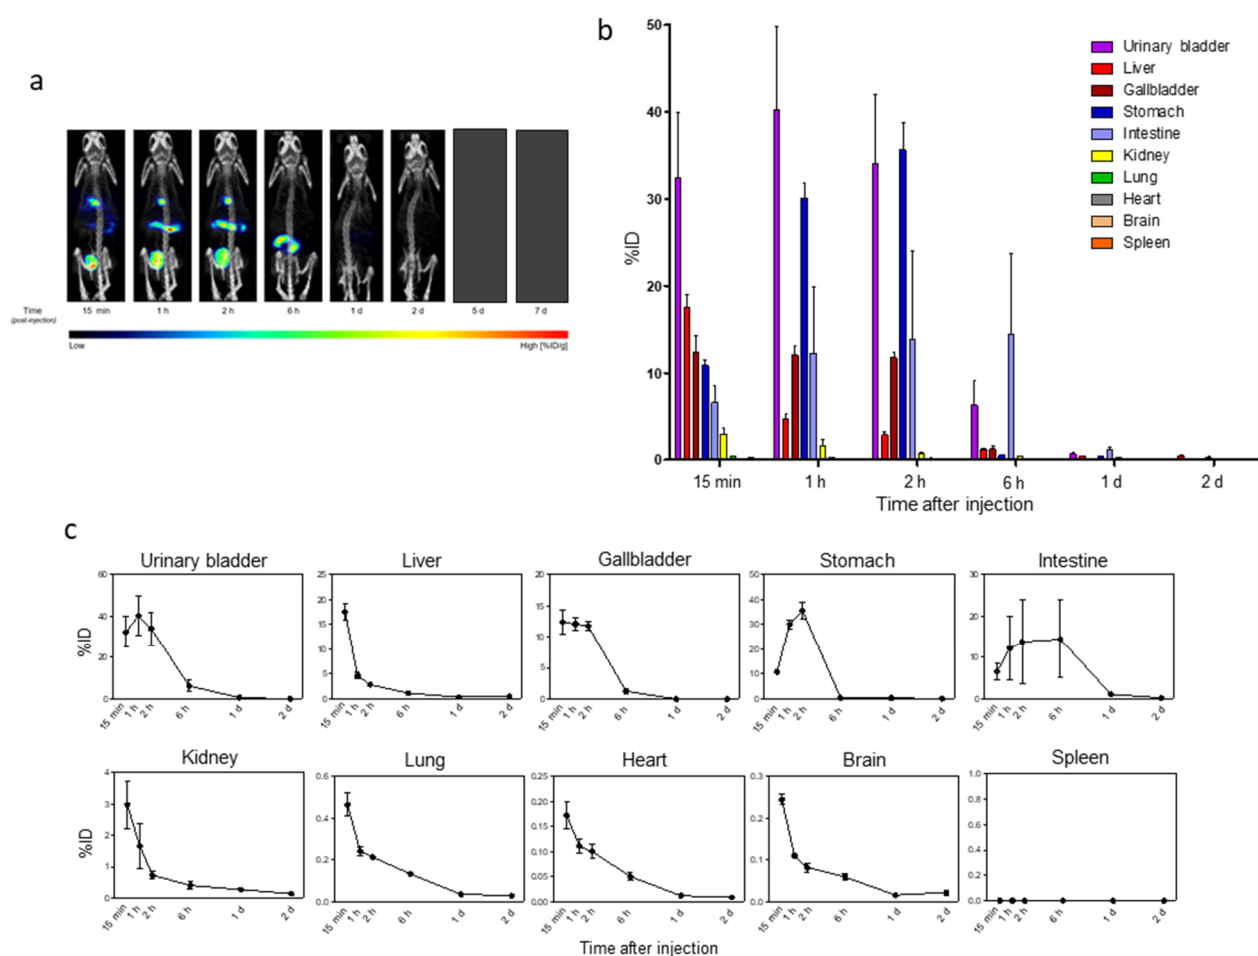

**Figure S2.** Biodistribution of free  $^{89}\text{Zr}$ . **(a)** Biodistribution of i.v. administrated  $^{89}\text{Zr}$ -DFO in mice were evaluated by %ID/g at various time points through PET/CT imaging. **(b)** Time-course distribution of  $^{89}\text{Zr}$ -DFO in various organs of mice were analyzed by volume-of-interest analysis extracted from the PET/CT image, which are shown as %ID with SEM at various time points. **(c)** Time-course distribution of  $^{89}\text{Zr}$ -DFO were shown in each organs as %ID with SEM.

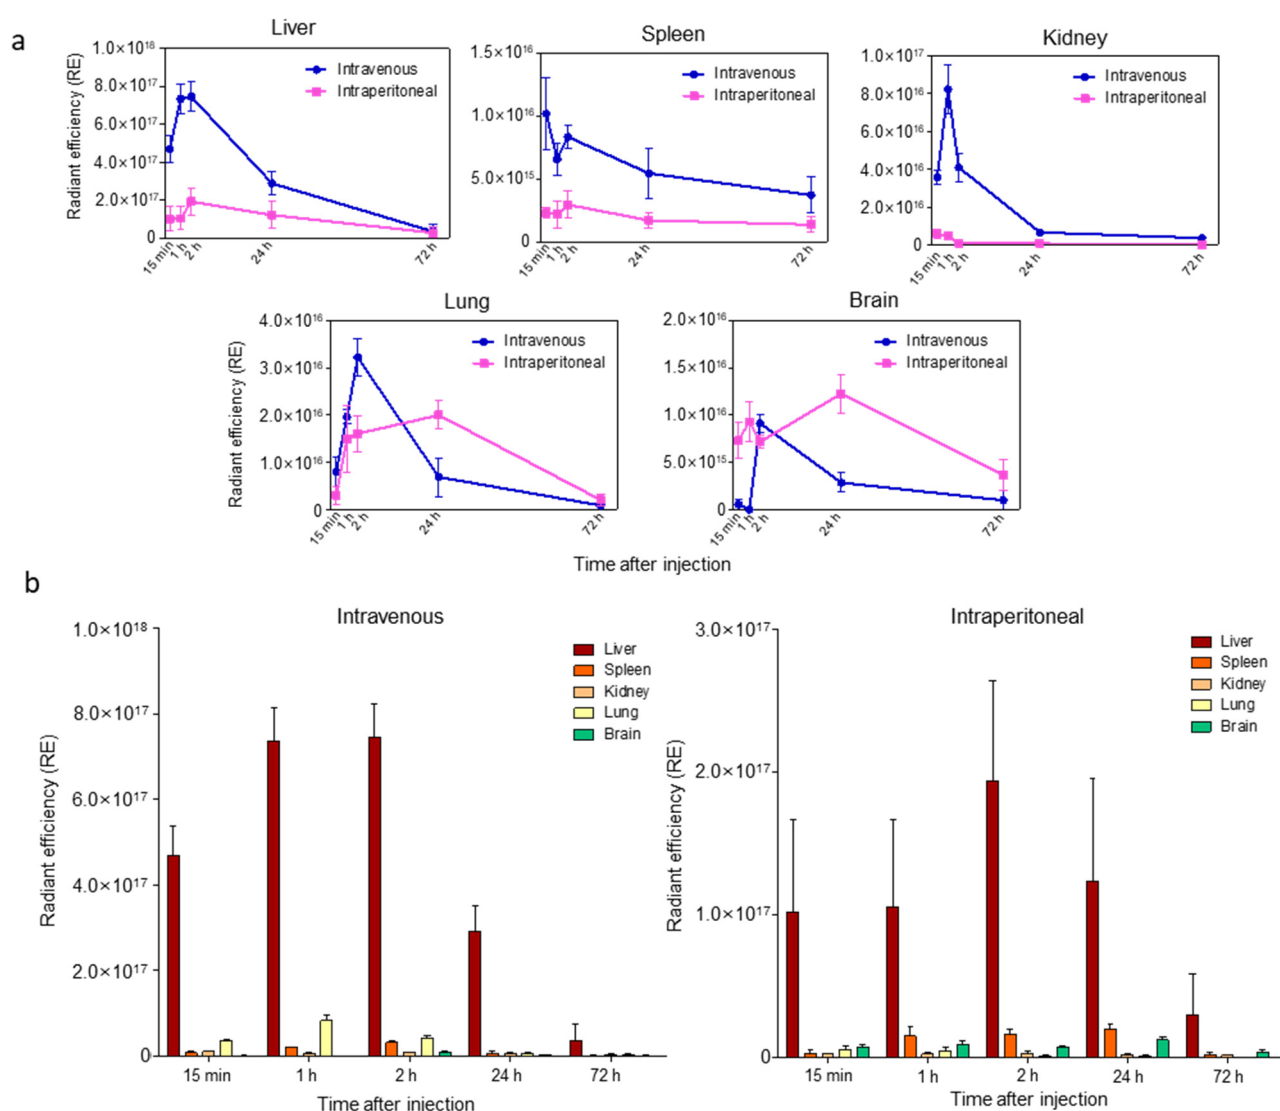

**Figure S3.** Biodistribution of fluorescent dye-labeled GMP-grade exosomes **(a)** Time-course biodistribution ExoGlow-labeled exosomes administered by i.v. or i.p. route in mice were evaluated by measuring radiant efficiency at various time points through in vivo fluorescence imaging (mean  $\pm$  SEM). **(b)** Time-course distribution of ExoGlow-labeled exosomes were organized by injection route (mean  $\pm$  SEM).

**Table S1.** Criteria for confirming batch-to-batch variances of therapeutic exosomes.

| Summary                   | Tests                                | Acceptance Criteria                                                                                  | Batch A          | Batch B          |
|---------------------------|--------------------------------------|------------------------------------------------------------------------------------------------------|------------------|------------------|
| <b>General properties</b> | Appearance                           | Colorless to yellow and clear to opalescent solution that may contain translucent to white particles | Pass             | Pass             |
|                           | pH                                   | 7.5 to 8.5                                                                                           | 7.8              | 7.8              |
| <b>Identity</b>           | srI $\kappa$ B protein               | Pass                                                                                                 | Pass             | Pass             |
| <b>Strength</b>           | Exosome particle number              | 4.0E+11 to 6.0E+11 pn/mL                                                                             | 4.7E+11          | 4.3E+11          |
|                           | Total protein                        | Report result                                                                                        | 138.4 $\mu$ g/mL | 119.6 $\mu$ g/mL |
|                           | srI $\kappa$ B protein concentration | Report result                                                                                        | 1.0 $\mu$ g/mL   | 1.0 $\mu$ g/mL   |
| <b>Purity</b>             | Purity                               | $\geq 90$ %                                                                                          | 95 %             | 96 %             |
| <b>Potency</b>            | In vitro TNF- $\alpha$ assay         | 50 < relative potency (%) < 150                                                                      | 94 %             | 110 %            |
| <b>Safety</b>             | Endotoxin                            | $\leq 5$ EU/mL                                                                                       | < 0.5 EU/mL      | < 5 EU/mL        |
|                           | Sterility                            | No growth                                                                                            | No growth        | No growth        |
